# Supplementary material
Source: PubMed Central journal article supplement (PMC6633606)
Supplement: develop-146-180422-s1.pdf [file develop-146-180422-s1.pdf]

A

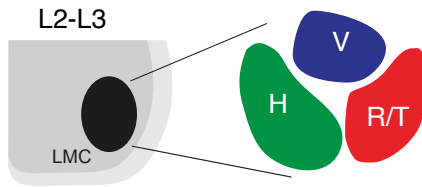

V: N T 6 10 11 12 22

H: N T 6 7 8 10 11 12 20 22

R/T: N T 6 8 10 11 20

B

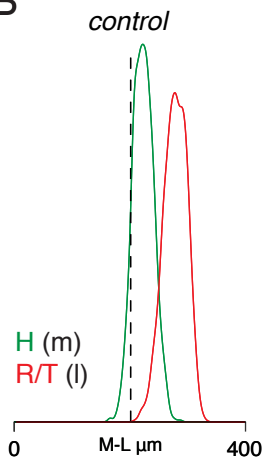

D

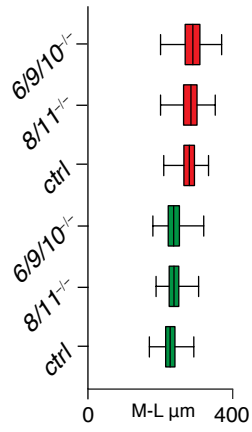

C

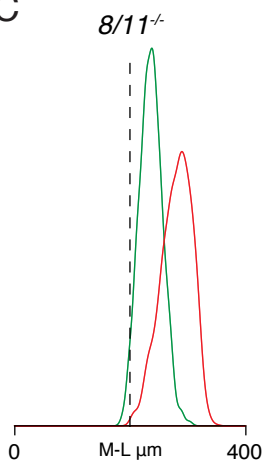

E

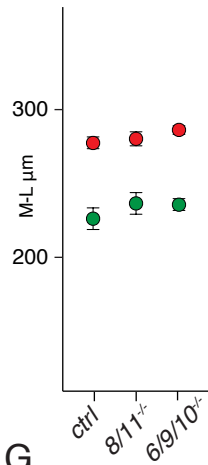

F

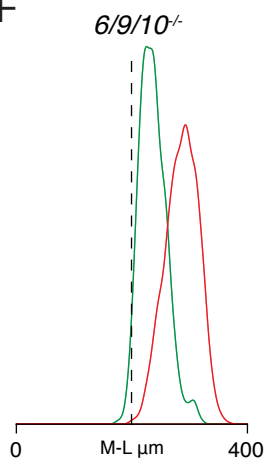

G

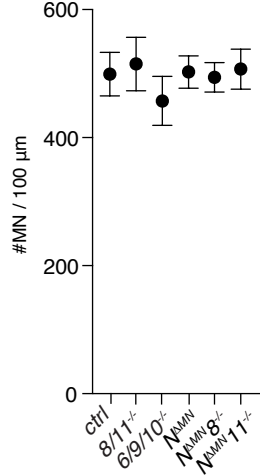

**Figure S1. Medio-lateral pool organization is preserved after elimination of type II cadherins specificity group.**

(A) Schematic showing classical cadherins expression by motor pools at lumbar levels 2-3.

(B and C) Medio-lateral density plots of H (green, medial) and R/T (red, lateral) neurons in control (B) and  $8/11^{-/-}$  (C) embryos.

(D) Box-plots of medio-lateral distributions of H (green, medial) and R/T (red, lateral) neurons in control,  $8/11^{-/-}$  and  $6/9/10^{-/-}$  embryos.

(E) Average medio-lateral position of H (green, medial) and R/T (red, lateral) neurons in control,  $8/11^{-/-}$  and  $6/9/10^{-/-}$  embryos (mean  $\pm$  SD; differences not significant for H neurons: control vs.  $8/11^{-/-}$   $p=0.250$ ; control vs.  $6/9/10^{-/-}$   $p=0.176$ ;  $8/11^{-/-}$  vs.  $6/9/10^{-/-}$   $p=0.997$ ; for R/T neurons: control vs.  $8/11^{-/-}$   $p=0.998$ ; control vs.  $6/9/10^{-/-}$   $p=0.05$ ;  $8/11^{-/-}$  vs.  $6/9/10^{-/-}$   $p=0.077$ ; one-way ANOVA and post hoc Tukey's HSD test).

(F) Medio-lateral density plot of H (green, medial) and R/T (red, lateral) neurons in  $6/9/10^{-/-}$  embryos.

(G) Average number of motor neurons in e13.5 lumbar spinal cords of control,  $8/11^{-/-}$ ,  $6/9/10^{-/-}$ ,  $N^{AMN}$ ,  $N^{AMN}8^{-/-}$ ,  $N^{AMN}11^{-/-}$  and  $\beta\gamma^{AMN}$  embryos (motor neurons/100 $\mu$ m, mean  $\pm$  SD; all differences between genotypes not significant  $p>0.05$ ; one-way ANOVA and post hoc Tukey's HSD test).

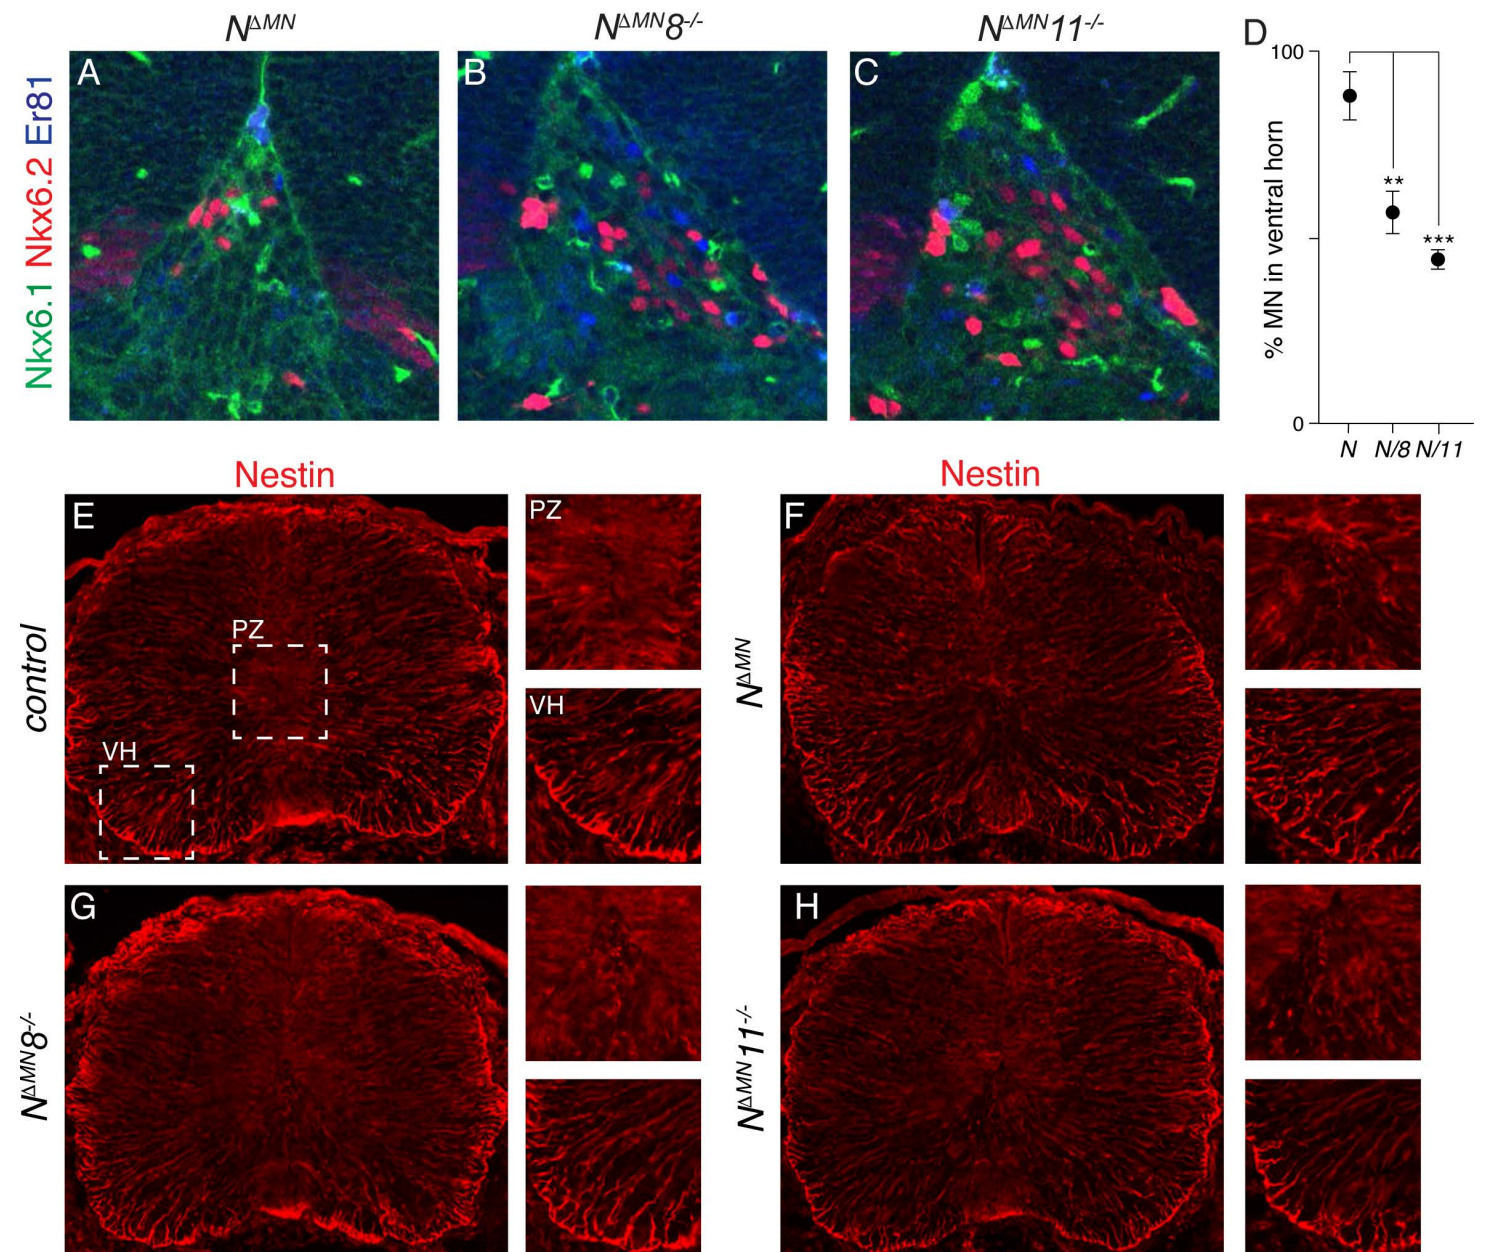

**Figure S2. Motor neuron migration arrest at the progenitor zone after joint elimination of *N-cadherin* and a type II cadherin.**

(A-C) Motor neurons at the progenitor zone in  $N^{\Delta MN}$  (A),  $N^{\Delta MN8^{-/-}}$  (B) and  $N^{\Delta MN11^{-/-}}$  (C) e13.5 embryos.

(D) Number of motor neurons found in the ventral horn expressed as percentage of total number in  $N^{\Delta MN}$ ,  $N^{\Delta MN8^{-/-}}$  and  $N^{\Delta MN11^{-/-}}$  embryos (mean  $\pm$  SD;  $N^{\Delta MN}$  vs.  $N^{\Delta MN8^{-/-}}$  \*\* $p < 0.01$ ;  $N^{\Delta MN}$  vs.  $N^{\Delta MN11^{-/-}}$  \*\*\* $p < 0.001$ ;  $N^{\Delta MN8^{-/-}}$  vs.  $N^{\Delta MN11^{-/-}}$   $p = 0.112$ ; one-way ANOVA and post hoc Tukey's HSD test).

(E-H) Radial glia organization assessed by nestin immunostaining in control (E),  $N^{\Delta MN}$  (F),  $N^{\Delta MN8^{-/-}}$  (G) and  $N^{\Delta MN11^{-/-}}$  (H) e13.5 embryos. Magnification of the progenitor zone (PZ) and ventral horn (VH) areas on the side.

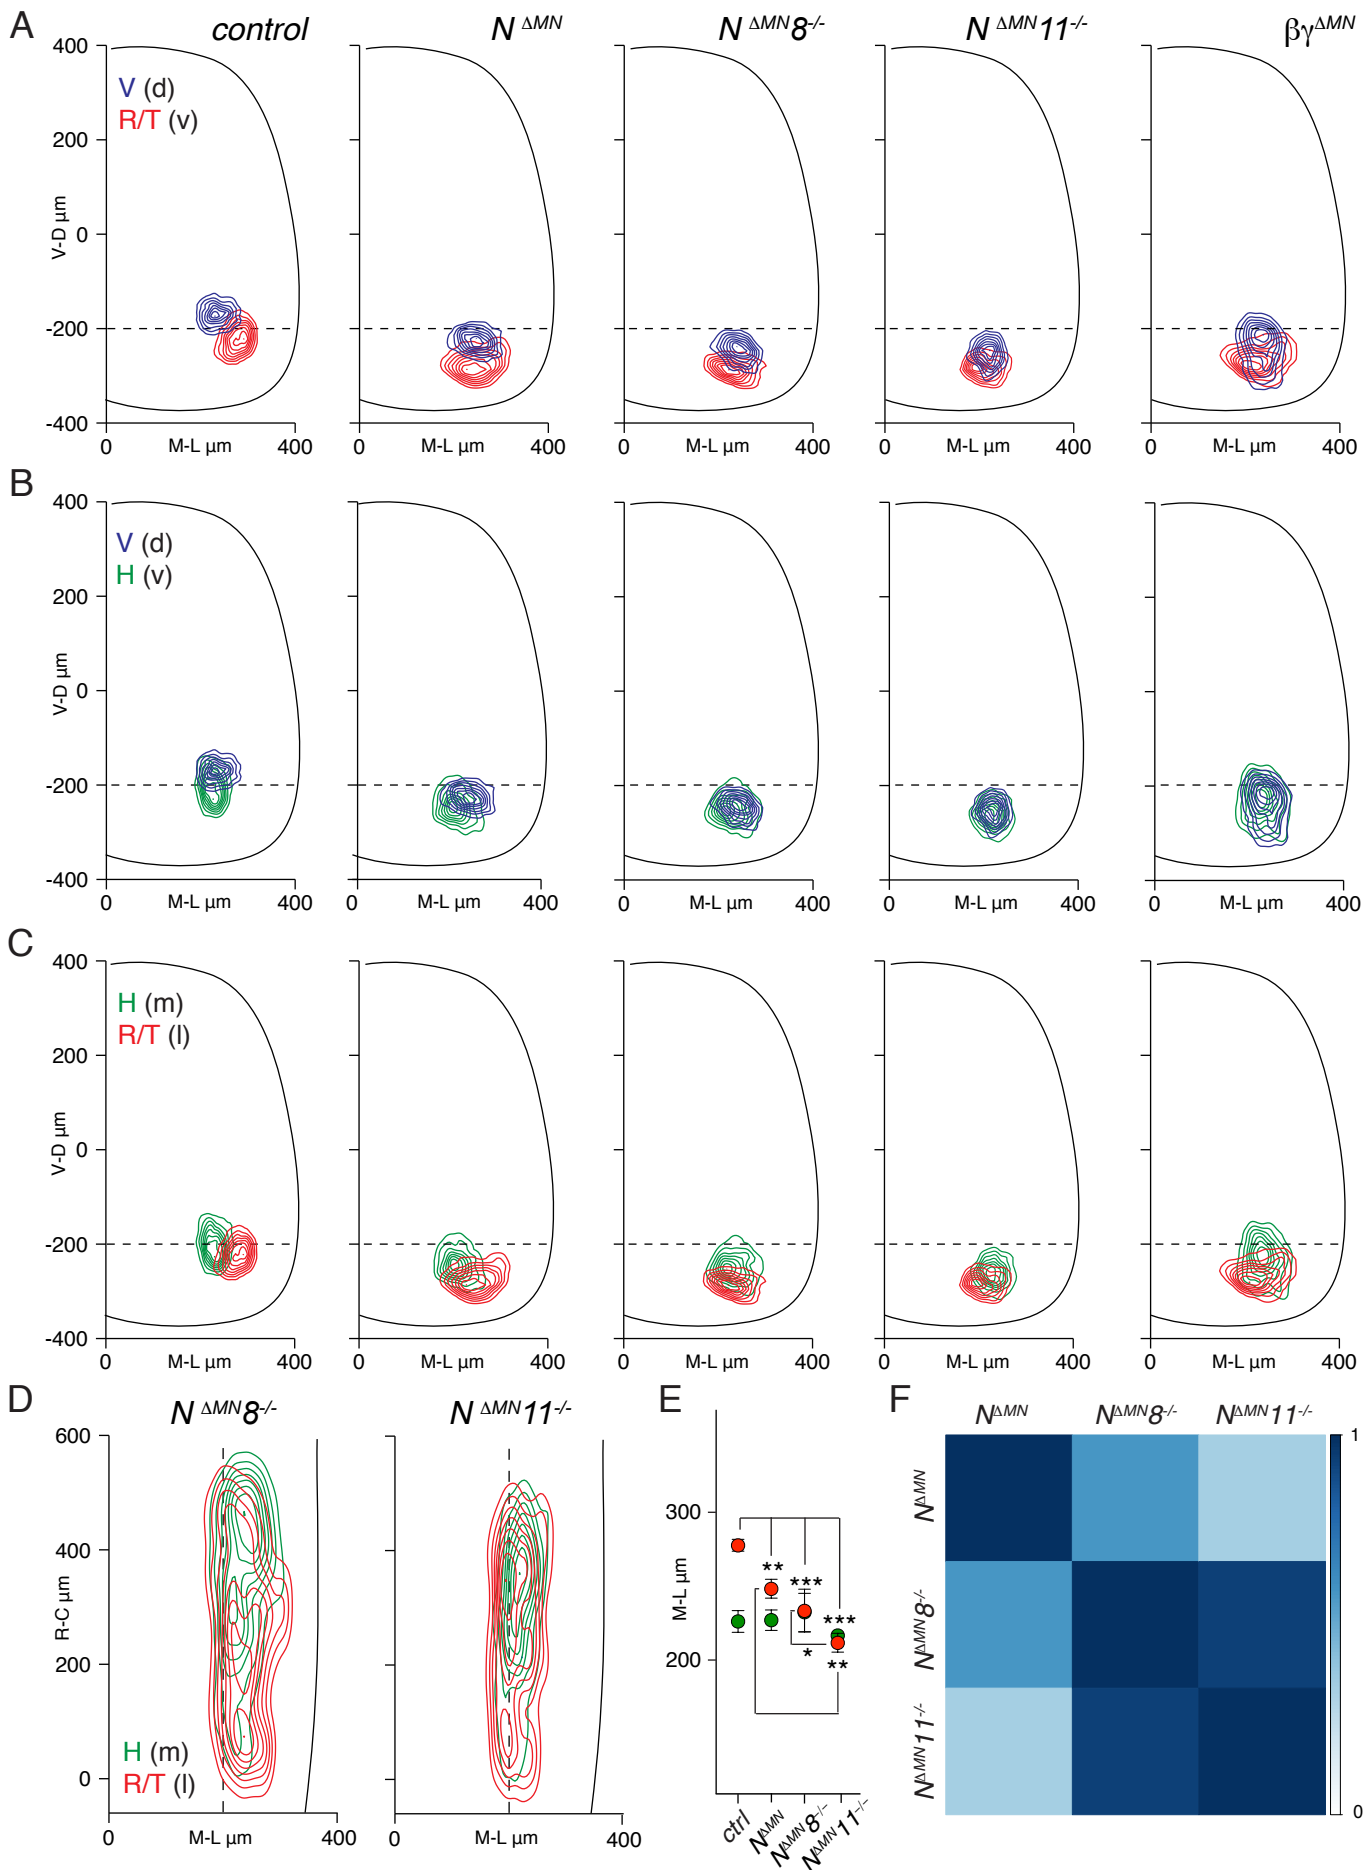

**Figure S3. Motor pools organization in cadherin/catenin mutant mice.**

(A) Transverse contour plots of V (blue, dorsal) and R/T (red, ventral) neurons in control,  $N^{\Delta MN}$ ,  $N^{\Delta MN} \delta^{-/-}$ ,  $N^{\Delta MN} II^{-/-}$  and  $\beta\gamma^{\Delta MN}$  embryos.

(B) Transverse contour plots of V (blue, dorsal) and H (green, ventral) neurons in control,  $N^{\Delta MN}$ ,  $N^{\Delta MN} \delta^{-/-}$ ,  $N^{\Delta MN} II^{-/-}$  and  $\beta\gamma^{\Delta MN}$  embryos.

(C) Transverse contour plots of H (green, medial) and R/T (red, lateral) neurons in control,  $N^{\Delta MN}$ ,  $N^{\Delta MN} \delta^{-/-}$ ,  $N^{\Delta MN} II^{-/-}$  and  $\beta\gamma^{\Delta MN}$  embryos.

(D) Coronal contour plots of H (green, medial) and R/T (red, lateral) neurons in  $N^{\Delta MN} \delta^{-/-}$  and  $N^{\Delta MN} II^{-/-}$  embryos.

(E) Average medio-lateral position of H (green, medial) and R/T (red, lateral) neurons in control,  $N^{\Delta MN}$ ,  $N^{\Delta MN} \delta^{-/-}$  and  $N^{\Delta MN} II^{-/-}$  embryos (mean  $\pm$  SD; for H neurons: control vs.  $N^{\Delta MN}$   $p=0.999$ ; control vs.  $N^{\Delta MN} \delta^{-/-}$   $p=0.810$ ; control vs.  $N^{\Delta MN} II^{-/-}$   $p=0.455$ ;  $N^{\Delta MN}$  vs.  $N^{\Delta MN} \delta^{-/-}$   $p=0.868$ ;  $N^{\Delta MN}$  vs.  $N^{\Delta MN} II^{-/-}$   $p=0.384$ ;  $N^{\Delta MN} \delta^{-/-}$  vs.  $N^{\Delta MN} II^{-/-}$   $p=0.126$ . For R/T neurons: control vs.  $N^{\Delta MN}$  **\*\*** $p<0.01$ ; control vs.  $N^{\Delta MN} \delta^{-/-}$  and  $N^{\Delta MN} II^{-/-}$  **\*\*\*** $p<0.001$ ;  $N^{\Delta MN}$  vs.  $N^{\Delta MN} \delta^{-/-}$   $p=0.212$ ;  $N^{\Delta MN}$  vs.  $N^{\Delta MN} II^{-/-}$  **\*\*** $p<0.01$ ;  $N^{\Delta MN} \delta^{-/-}$  vs.  $N^{\Delta MN} II^{-/-}$  **\*** $p<0.05$ ; one-way ANOVA and post hoc Tukey's HSD test).

(F) Correlation analysis of V neurons dorso-ventral coordinates in  $N^{\Delta MN}$ ,  $N^{\Delta MN} \delta^{-/-}$ , and  $N^{\Delta MN} II^{-/-}$  embryos. Scale bar indicates correlation values ( $N^{\Delta MN} \delta^{-/-}$  vs.  $N^{\Delta MN} II^{-/-}$   $r=0.94$ ;  $N^{\Delta MN}$  vs.  $N^{\Delta MN} \delta^{-/-}$   $r=0.34$ ;  $N^{\Delta MN}$  vs.  $N^{\Delta MN} \delta^{-/-}$   $r=0.58$ ).

**Table S1. Genotype, number of embryos, and number of sections per embryo analyzed for positional analysis.**

| Experiment                            | MN Subtype | Genotype                                                                    | Embryo ID | # of Sections/Embryo |
|---------------------------------------|------------|-----------------------------------------------------------------------------|-----------|----------------------|
| “control”                             | Divisions  | <i>afadin fl/+</i>                                                          | #6        | 32                   |
|                                       |            |                                                                             | #8        | 27                   |
|                                       |            |                                                                             | #25       | 30                   |
| “control”                             | Pools      | <i>afadin fl/+</i>                                                          | #6        | 31                   |
|                                       |            |                                                                             | #7        | 29                   |
|                                       |            |                                                                             | #43       | 30                   |
| “8/11 <sup>-/-</sup> ”                | Division   | <i>cadherin-8 -/-;</i><br><i>cadherin-11 -/-</i>                            | #4        | 27                   |
|                                       |            |                                                                             | #7        | 32                   |
|                                       |            |                                                                             | #2        | 27                   |
| “8/11 <sup>-/-</sup> ”                | Pools      | <i>cadherin-8 -/-;</i><br><i>cadherin-11 -/-</i>                            | #2        | 26                   |
|                                       |            |                                                                             | #5        | 30                   |
|                                       |            |                                                                             | #6        | 24                   |
| “6/9/10 <sup>-/-</sup> ”              | Pools      | <i>cadherin-6 -/-;</i><br><i>cadherin-9 -/-;</i><br><i>cadherin-10 -/-</i>  | #1        | 19                   |
|                                       |            |                                                                             | #4        | 23                   |
|                                       |            |                                                                             | #6        | 17                   |
| “N <sup>AMN</sup> ”                   | Divisions  | <i>N-cadherin fl/-;</i><br><i>Olig2::Cre +/-</i>                            | #68       | 20                   |
|                                       |            |                                                                             | #72       | 30                   |
|                                       |            |                                                                             | #73       | 31                   |
| “N <sup>AMN</sup> ”                   | Pools      | <i>N-cadherin fl/-;</i><br><i>Olig2::Cre +/-</i>                            | #6        | 30                   |
|                                       |            |                                                                             | #10       | 26                   |
|                                       |            |                                                                             | #66       | 31                   |
| “βγ <sup>AMN</sup> ”                  | Divisions  | <i>β-catenin fl/fl;</i><br><i>γ-catenin fl/-;</i><br><i>Olig2::Cre +/-</i>  | #9        | 31                   |
|                                       |            |                                                                             | #2        | 32                   |
|                                       |            |                                                                             | #13       | 30                   |
| “βγ <sup>AMN</sup> ”                  | Pools      | <i>β-catenin fl/fl;</i><br><i>γ-catenin fl/-;</i><br><i>Olig2::Cre +/-</i>  | #2        | 25                   |
|                                       |            |                                                                             | #3        | 28                   |
|                                       |            |                                                                             | #4        | 28                   |
| “N <sup>AMN</sup> 8 <sup>-/-</sup> ”  | Divisions  | <i>N-cadherin fl/-;</i><br><i>cadherin-8 -/-;</i><br><i>Olig2::Cre +/-</i>  | #40       | 29                   |
|                                       |            |                                                                             | #58       | 31                   |
|                                       |            |                                                                             | #60       | 31                   |
| “N <sup>AMN</sup> 8 <sup>-/-</sup> ”  | Pools      | <i>N-cadherin fl/-;</i><br><i>cadherin-8 -/-;</i><br><i>Olig2::Cre +/-</i>  | #5        | 24                   |
|                                       |            |                                                                             | #64       | 26                   |
|                                       |            |                                                                             | #110      | 26                   |
| “N <sup>AMN</sup> 11 <sup>-/-</sup> ” | Pools      | <i>N-cadherin fl/-;</i><br><i>cadherin-11 -/-;</i><br><i>Olig2::Cre +/-</i> | #4        | 24                   |
|                                       |            |                                                                             | #5        | 28                   |
|                                       |            |                                                                             | #7        | 21                   |
|                                       |            |                                                                             | #8        | 19                   |
